# Supplementary material for: PTK6 inhibition promotes apoptosis of Lapatinib-resistant Her2+ breast cancer cells by inducing Bim
Source: PubMed Central journal article supplement (PMC4496943; doi:10.1186/s13058-015-0594-z), 2015-06-19

Additional file 3: Figure S3

A.

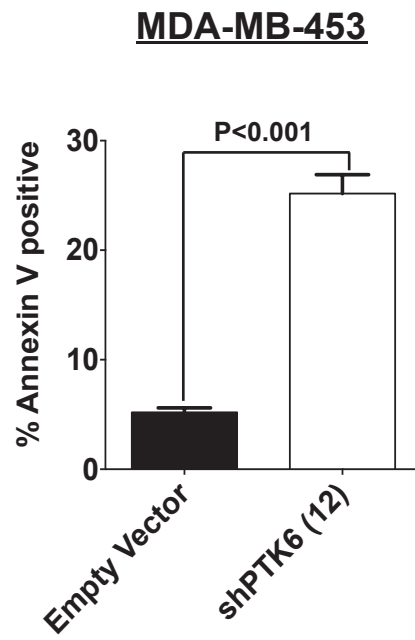

B.

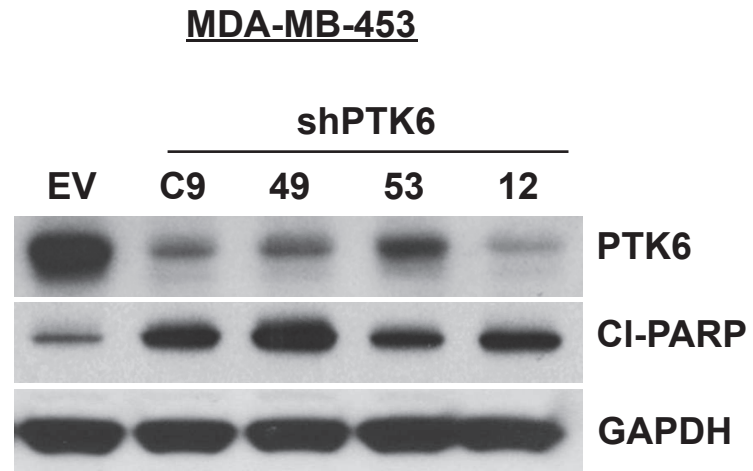

Supplement: 13058_2015_594_MOESM3_ESM.pdf [file 13058_2015_594_MOESM3_ESM.pdf]
