# Supplementary material for: PTK6 inhibition promotes apoptosis of Lapatinib-resistant Her2+ breast cancer cells by inducing Bim
Source: PubMed Central journal article supplement (PMC4496943; doi:10.1186/s13058-015-0594-z), 2015-06-19

**Additional file 5: Figure S5.**

**UACC893R1**

|   |   |   |   |                        |
|---|---|---|---|------------------------|
| - | - | + | + | Z-Vad-fmk (50 $\mu$ M) |
| - | + | - | + | shPTK6                 |

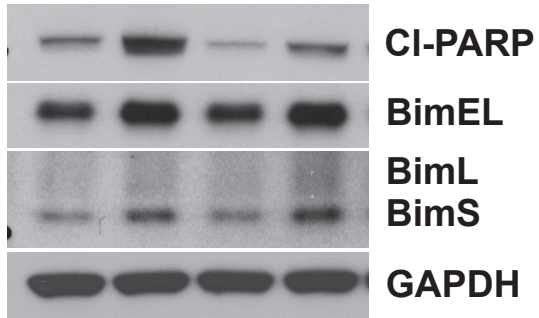

Supplement: 13058_2015_594_MOESM5_ESM.pdf [file 13058_2015_594_MOESM5_ESM.pdf]
